# Supplementary material
Source: Springer Nature journal article supplement (https://www.springermedizin.de/resource/supplementary/12943_2012_1113_MOESM1_ESM.pdf/9552486)

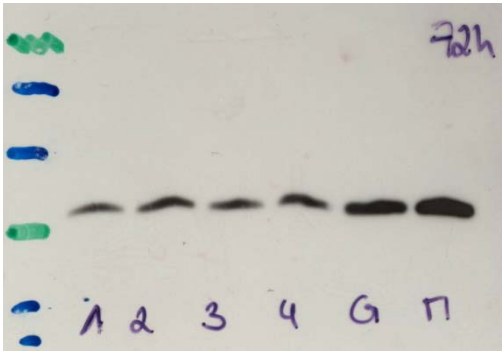

1: siRNA1  
2: siRNA2  
3: siRNA3  
4: siRNA4  
G: siRNA\_GAPDH  
M: mock

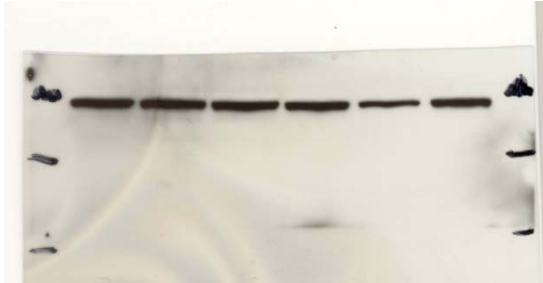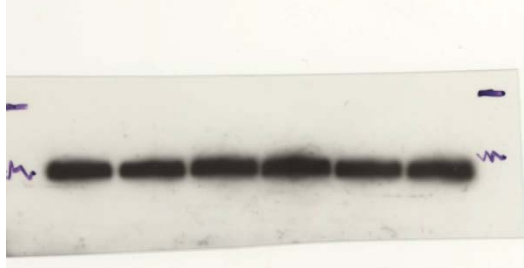

Supplement: MOESM1 [file 9552486]
